# Supplementary material
Source: PubMed Central journal article supplement (PMC3311111)
Supplement: NIHMS362733-supplement-1_si_001.pdf [file NIHMS362733-supplement-1_si_001.pdf]

## Supplementary Information File

### OccK Channels from *Pseudomonas aeruginosa* Exhibit Diverse Single-channel Electrical Signatures, but Conserved Anion Selectivity

Jiaming Liu<sup>1</sup>, Elif Eren<sup>2</sup>, Jagamy Vijayaraghavan<sup>2</sup>, Belete R. Cheneke<sup>1</sup>, Mridhu Indic<sup>2</sup>, Bert van den Berg<sup>2</sup> and Liviu Movileanu<sup>1,3,4</sup>

<sup>1</sup>*Department of Physics, Syracuse University, 201 Physics Building, Syracuse, New York 13244-1130, USA*

<sup>2</sup>*Program in Molecular Medicine, University of Massachusetts Medical School, Worcester, Massachusetts 01605, USA*

<sup>3</sup>*Structural Biology, Biochemistry, and Biophysics Program, Syracuse University, 111 College Place, Syracuse, New York 13244-4100, USA*

<sup>4</sup>*Syracuse Biomaterials Institute, Syracuse University, 121 Link Hall, Syracuse, New York 13244, USA*

**Running title:** Outer membrane proteins from *Pseudomonas aeruginosa*

**Key words:** • Single-channel electrical recordings; • Single-molecule biophysics; • Channel gating; • The kinetic rate theory; • The OccK family.

†This paper is funded in part by grants from the US National Science Foundation (DMR-1006332, L.M.) and the National Institutes of Health (R01 GM088403, L.M. and R01 GM085785, B.v.d.B).

**Corresponding author:** Liviu Movileanu, PhD, Department of Physics, Syracuse University, 201 Physics Building, Syracuse, New York 13244-1130, USA; Phone: 315-443-8078; Fax: 315-443-9103; E-mail: [lmovilea@physics.syr.edu](mailto:lmovilea@physics.syr.edu)

# Figure S1

A

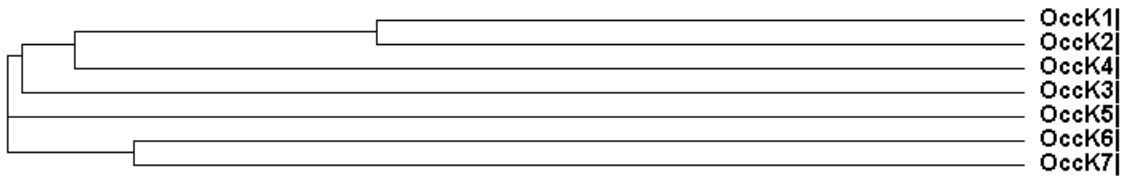

B

```

OccK1 | -----AEGGFLEDAKTDLVLNRNYFNDRFRDHDAGKSLVDEWAQGFILKFS SGYTP 51
OccK2 | -----GHVHAGQGFLKASLTARNFHLHRNFVG-DASQGKAEWWTQS FILDARSGFTQ 54
OccK3 | -----DLVEDSHASLELRNFYFNDRFRQSGARDN-AD EWAQGFLLRLESGFSE 47
OccK4 | -----EFLADSSAHLDLRFNFYQLRDYRQHDAPQSQAGNWSQGFVLRLOSGFTG 48
OccK5 | VLAGIAPLGNAGFLEDSKASLETRNFYMNDRFRD-GPGQSKREEWAQGFILNLQSGYTQ 59
OccK6 | -----EFIKDSKASIELLRNFYFNDRFRQEGASQSKAEWAQGFLLRYE SGYTE 48
OccK7 | -----EFFADGKAGLELRNFYFNDRYRQPGASQSYSEWAQGFLLRYESGYTE 48
          : . * . : : * * : : * : : . . . : * * * * * * * * * :
    
```

```

OccK1 | GTVGVGLDAIGLFGVKLNSGRGTSNSELLPLH-DDGRAADNYGRVGVAAKLRVSA SELKI 110
OccK2 | GSVGFGLDVLGLYSLKLDGKGKTAGTQLLPIH-DDGRPADDFGRLAVAGKLRVSN SELKI 113
OccK3 | GTVGFVDAIGLLGFKLDSGSGSGGTGLLPADGSAGGSQDDYAKLGLTAKARVSN SLLKV 107
OccK4 | GPLGFGLDATGLLGVKLDSGRGRSNDGTLPEFGANSKEPVDDYSHLGLTAKLRY SQTQLQV 108
OccK5 | GTVGVGLDAMGMLGVKLDSSGRSGTGLLPKD-SDGRAPDITYSKLGLTAKVKV SSELKV 118
OccK6 | GTIGFGVDAIGLLGVKLDSSPDRSGTGLLRDRETGRAQDDYGEAGITAKLRASK S TLKI 108
OccK7 | GLFGLGVDALGLLGVRDSSPERSGSGLLPYSTSDRRAAHDYSSLGLTAKLRVSH S TLKI 108
          * . * . * * * * : : * * : : . . . * . . . . : : * * : * : * :
    
```

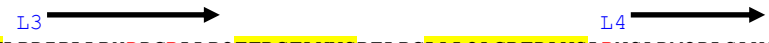

```

OccK1 | GEMLPDIPLLRYDDGRLLPQTFRGFVVSRELPG LALQAGRFDVSLRNSADMQDLSAWS 170
OccK2 | GEWMPVLPILRSDDGRSLPQTFRGGQLSANEIAGLTLYAGQFRGNSPNDASMQDMSLFG 173
OccK3 | GALHFKSPVLSANDTRLPELFRGALLDVEIDGLTLRGAHLDRNKLNSSSDYQVFSANR 167
OccK4 | GIIMPQLPVAFRDDVRLPQTFDGALLTSSEIEGLTLTAGQLWKSRTRESAGSDDMYIMG 168
OccK5 | GTLIPKLPVQPNNGRIFFQIFEGALLTSKEIKDLGFTAGRLEKTKIRDSSDSEDLALND 178
OccK6 | GTLTPKLPVIMPNDSSRLPQTFQGGALNSMEIDGLTLTDAGRLKKNVQRDSSDNEDMTITG 168
OccK7 | GTLMPRLPVVQFNDTRLHPQTFQGGLELVNEIDGLALQFGQLRQVKQRDSTNAEDLGITR 168
          * . * . * * : : * * * * : * : * : : : . . . : : :
    
```

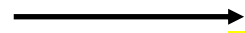

```

OccK1 | APTQK-----SDGFNYAGAEYRFNRERTQLGLWHGQLEDVYRQSYANLLHKQRVGDW 222
OccK2 | RPAAT-----SDRFDAGGEYRFNGERSLLGLWNAELKDIYRQYQLQLQHSQPLGDW 225
OccK3 | IGGF-----SDFDFAGGDYRLT-PALTASLHQGRKLDIYRQTFAGLVHTLDDLGGQ 217
OccK4 | RDKAH-----ASDEFNLAGATYAFT-PRLSASYYYGQLKDIYRQHLYGLLHTLPLGEG 220
OccK5 | KNGR----FAGVSADHFDLGGLDYKLT-DQLTASYHYSNLQDVYRQHFVGLLHSSWPIGPG 233
OccK6 | GGKRNIVVRSGLTSDKDFDFAGGSYKWT-DNLSYHYGKLDNFYKQHLYGLVHTLPIADK 227
OccK7 | GNKRNVLAGRHGSDRDFDFAGGTYRWS-ERLSSSYHYANLEDFYRQHHLGVQHLLPLADD 227
          : * * : * * . . . . * * * * : * : :
    
```

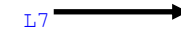

```

OccK1 | T-LGANLGLFVDRDDGAARAGEIDSHTVYGLFSAGTGLHTFFYLGLQKVGGD SGWQSVYGS 281
OccK2 | L-LGANLGGFRGRDAGSARAGKLDNRTVSALFSARYGLHTLYLGLQKVS GDDGWMRVNGT 284
OccK3 | RSLKSDLRFARASEDGGFR--ELDNRAFGALFSLRLGAHAVAAGYQRIS GDDPYPIYAG- 274
OccK4 | LSLRSDLRYFDSGEDGAAISGPVDNRNLNAMLTLAGAHAFGIGVQKMI GNDAPPVINGY 280
OccK5 | E-LTSDLRFARSTDSSSAKAGGIDNKSLSNGMFTYSLGNHAFGAAWQRMN GDDAPPYLEG- 291
OccK6 | QSLKSDIRWARSTDDGSS---NVDNKALNAMFTYSLGYHAFGVGYQKMS GDTGFAYING- 283
OccK7 | QSLKSDIRWARSTDEGGS---RVNRRALNALFTYRLGGHAFGLGYQRMSGDSGFAYLAG- 283
          * : : : : * . . : : : . : : : * * . . * * : * : : *
    
```

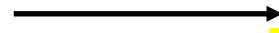

```

OccK1 | SGRSMGNDFMNGNFTNADE RSWQVRYDYDFVGLGWPLIGMVRVYGHGSNATTKAGSG-GK 340
OccK2 | SGGTLANDSYNASYDNPGER RSWQLRYDFDFVGLGLPLGLTFMTRYLHGDHVRLAGVTDGGS 344
OccK3 | SDPYLVNFIQIGDFGNVDER RSWQLRYDYDFGALGLPLGLSFMSRYVSGDNVARG-AANDGK 333
OccK4 | TTPYVANLMAYQTFTRPQEKSWQLRYDYDFAGLGLPLGLNLMTRYVQGRDIDRAGGRADDS 340
    
```

```

OccK5| SNPYLVNFVQVNDVDFAGPKERRSWQLRYDYD FVGLGIPGLTFMTRVVKGD NVELAGQSGEGR 351
OccK6| ADPYLVNFIQIGDFANKDEKSWQARYDYN FAGVGIPGLTFMTRVVKGD NIDLLTTSGEGR 343
OccK7| TDPYLVNFVQIGDFANKDERSWQLRYDYDFAAIGLPGLTFMSTRYLARGEHIDLDDGGGRGK 343
      :   : *           :   * : * * * * * : * . : * * * * * * * .
      .

OccK1| EWERDVELGYT VQSGPLARLNVRNLNHASNRRSFNS --DFDQTRLVVS YPLSW- 390
OccK2| EWGRESELGYT LQSGAFKRLNVRWRNSSQRR DWGSNTRFDENRLIVSYPLS LL 397
OccK3| EWERNTDLGYV VQSGPLKNLGVKWRNATVRS NFAN--DLDENRLILSYSLALW 384
OccK4| EWERNTDLSYV IQSGPLKSVALKWRNITYRS RYGA--DLDENRFIVNYTLKLW 391
OccK5| EWERNTLQYV FQSGALKNLGIRWRNATFRS NFTR--DIDENRLIVSYTLPIW 402
OccK6| EWERDMDIAYV FQSGPLKNLGVKWRNATMRT NYTN--DYDENRLIVSYTLPLW 394
OccK7| EWERDTDIAYLV QSGPLKNLGIKLRNGTFRS DFGN--DIDETRLIVSYALPLW 394
      * * * : : * . * * * : : : : : * : * : * : * : * .

```

**Figure S1 Amino acid sequence analysis of seven OccK subfamily members.** (A) Phylogenetic tree generated by ClustalW2 (Version 2.1, The European Bioinformatics Institute, UK) and (B) Sequence homology analysis generated by Clustal Omega (Version 1.0.3, The European Bioinformatics Institute, UK), where conserved sites are marked with '\*', ':', or '.' at the bottom of the sequences. An asterisk (\*) indicates positions which have a single, invariant residue. A colon (:) indicates conservation between groups of strongly similar properties (scoring > 0.5 in the Gonnet PAM 250 matrix). A period (.) indicates conservation between groups of weakly similar properties (scoring =< 0.5 in the Gonnet PAM 250 matrix). The  $\beta$ -barrel regions are highlighted in yellow. The charged amino acids located near the central constriction are marked in red. Large extracellular loops L3, L4, and L7, which are folded back into the channel lumen, are indicated by horizontal arrows.

## Figure S2 A OccK1

(i)

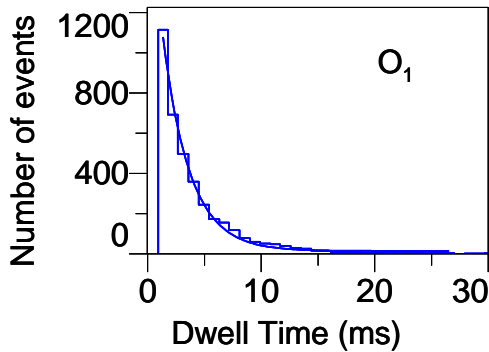

(ii)

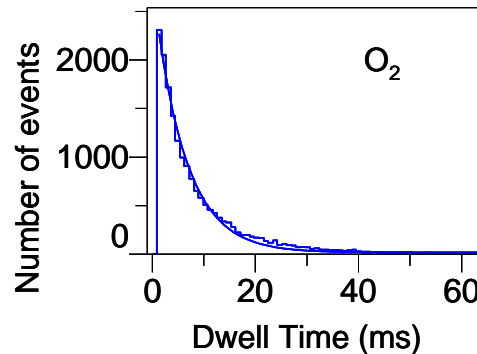

(iii)

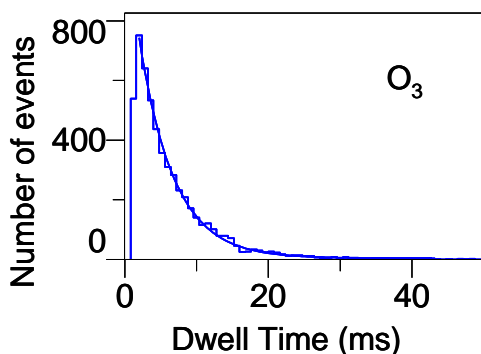

(iv)

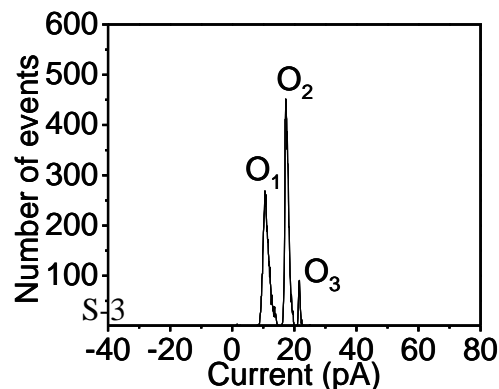

## B OccK2

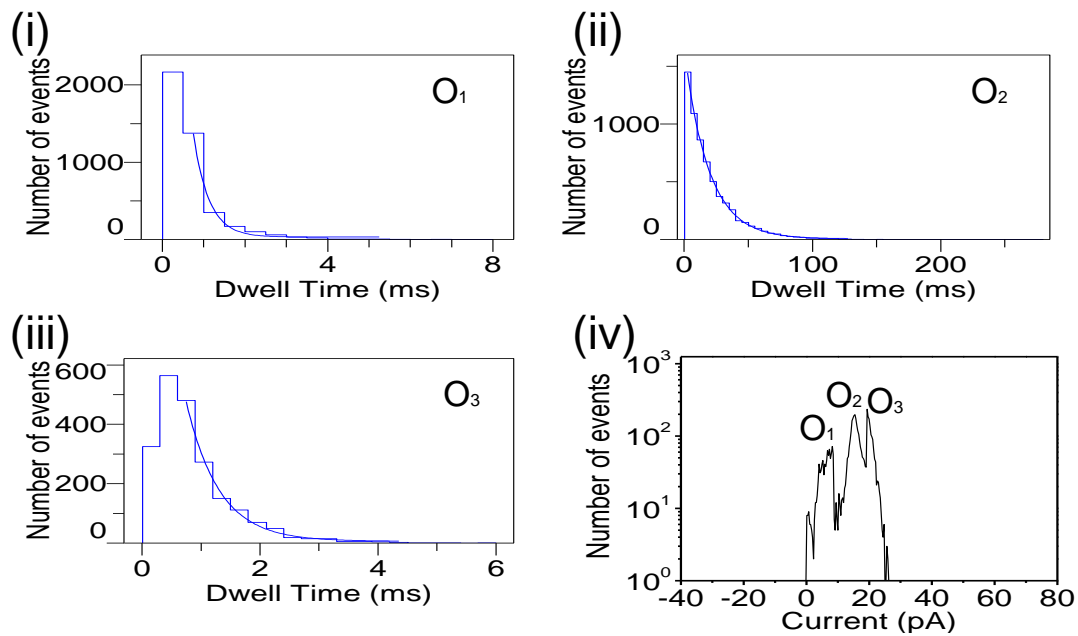

## C OccK4

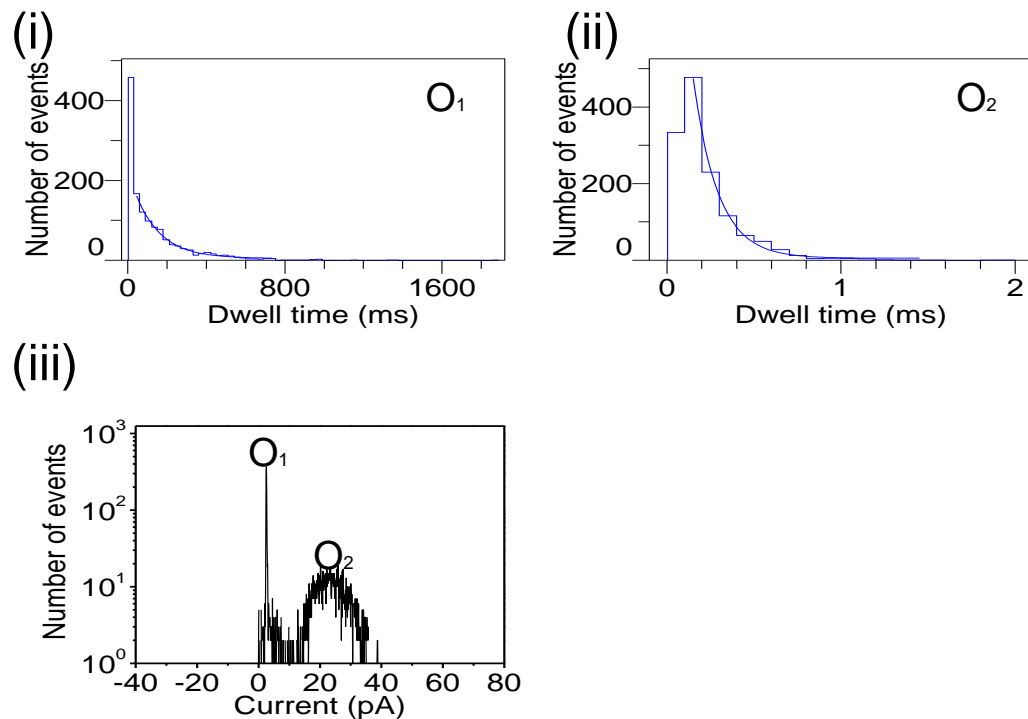

## D OccK5

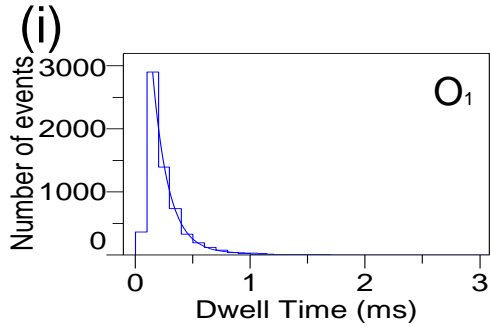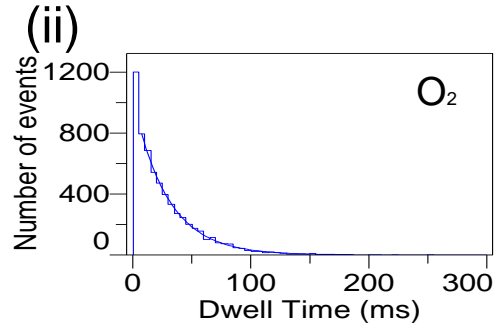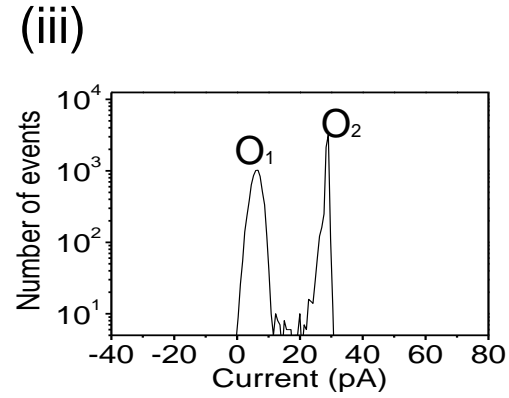

## E OccK6

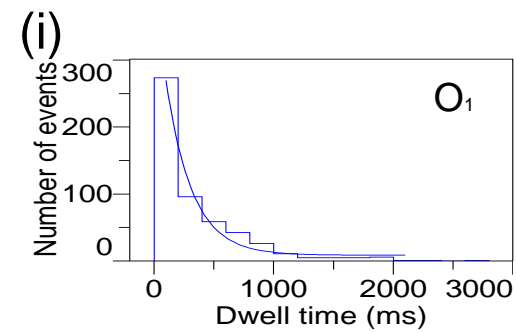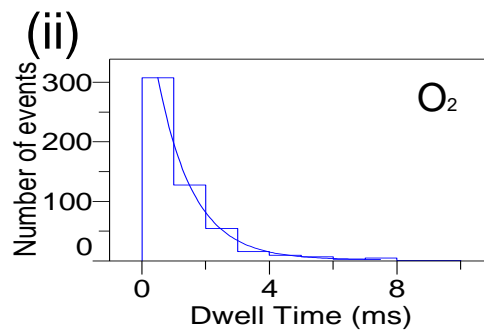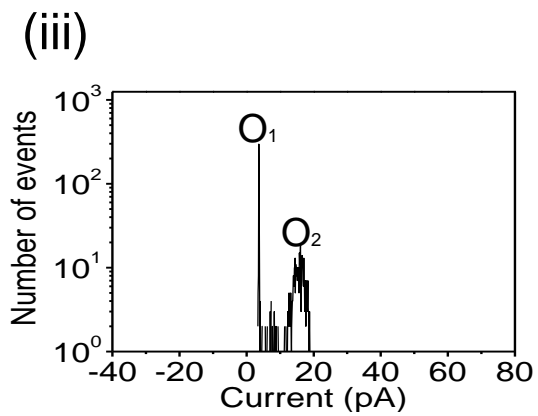

## F OccK7

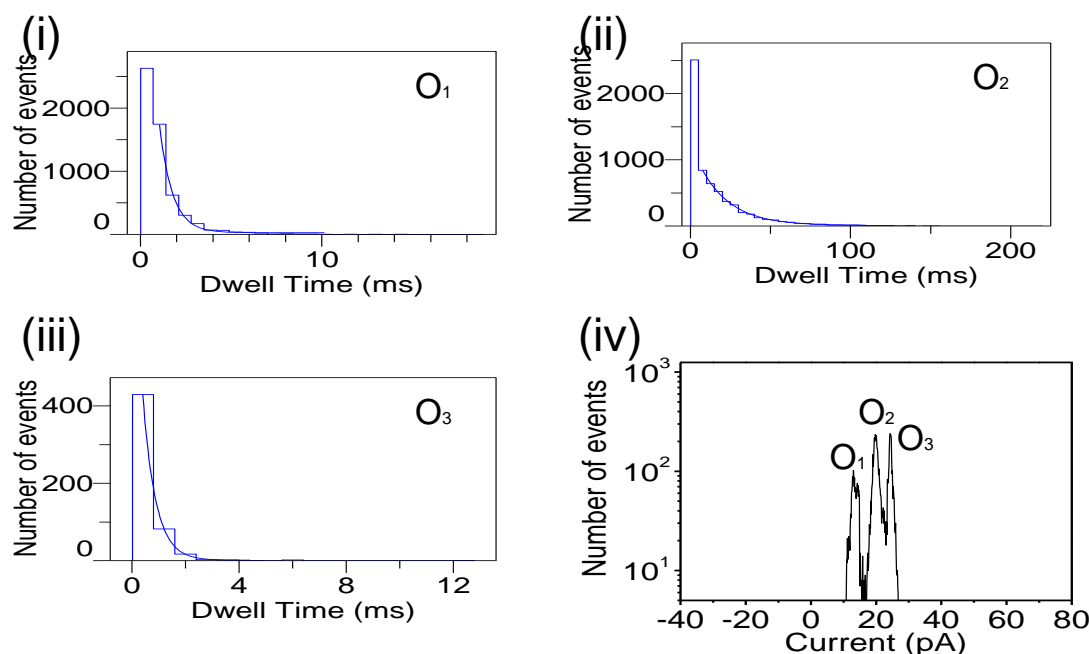

**Figure S2 The single-channel sub-state transition analyses of the OccK subfamily members. (A)** OccK1, **(B)** OccK2, **(C)** OccK4, **(D)** OccK5, **(E)** OccK6 and **(F)** OccK7. For **(A)**, **(E)** and **(F)**, (i),(ii), and (iii) are the dwell time histograms of the O<sub>1</sub>, O<sub>2</sub>, and O<sub>3</sub> open sub-states, respectively. In these cases, (iv) represent the fitted current amplitude histograms, indicating the number of events of each open sub-state. For **(B)**, **(C)**, and **(D)**, (i) and (ii) are the dwell time histograms of the O<sub>1</sub> and O<sub>2</sub> open sub-states, whereas (iii) are the fitted current amplitude histograms. Data were collected in 1M KCl, 10 mM potassium phosphate, pH=7.4, and at a transmembrane potential of +60 mV. For OccK4 and OccK6, the traces were low-pass Bessel filtered at 5 kHz. In the case of the other protein channels, we used a filtering frequency of 2 kHz. All the dwell time histograms are fitted to a single-exponential distribution, as judged by log likelihood ratio (LLR) tests with a confidence level of 95% (*I*;2). The fitting results of the dwell time histograms were the following:  $\tau_{O_1}$  (OccK1) =  $2.37 \pm 0.06$  ms;  $\tau_{O_2}$  (OccK1) =  $6.09 \pm 0.08$  ms;  $\tau_{O_3}$  (OccK1) =  $4.79 \pm 0.06$  ms;  $\tau_{O_1}$  (OccK2) =  $0.38 \pm 0.02$  ms;  $\tau_{O_2}$  (OccK2) =  $19.16 \pm 0.23$  ms;  $\tau_{O_3}$  (OccK2) =  $0.56 \pm 0.02$  ms;  $\tau_{O_1}$  (OccK4) =  $129 \pm 6$  ms;  $\tau_{O_2}$  (OccK4) =  $0.14 \pm 0.01$  ms;  $\tau_{O_1}$  (OccK5) =  $29.1 \pm 0.4$  pS;  $\tau_{O_2}$  (OccK5) =  $0.12 \pm 0.01$  ms;  $\tau_{O_1}$  (OccK6) =  $219 \pm 20$  ms;  $\tau_{O_2}$  (OccK6) =  $1.11 \pm 0.03$  ms;  $\tau_{O_1}$  (OccK7) =  $0.72 \pm 0.03$  ms;  $\tau_{O_2}$  (OccK7) =  $19.1 \pm 0.3$  ms;  $\tau_{O_3}$  (OccK7) =  $0.48 \pm 0.01$  ms.

## A three-open sub-state kinetic model for the current fluctuations of the OccK proteins

Using standard formalisms of chemical kinetics for single-molecule fluctuations of the OccK protein channel (3), we have the following system of partial differential equations (4-6):

$$\begin{aligned}\frac{dP_{O_1}}{dt} &= -k_{O_1 \rightarrow O_2} P_{O_1} + k_{O_2 \rightarrow O_1} P_{O_2} \\ \frac{dP_{O_2}}{dt} &= +k_{O_1 \rightarrow O_2} P_{O_1} - k_{O_2 \rightarrow O_1} P_{O_2} + k_{O_3 \rightarrow O_2} P_{O_3} - k_{O_2 \rightarrow O_3} P_{O_2} \\ \frac{dP_{O_3}}{dt} &= -k_{O_3 \rightarrow O_2} P_{O_3} + k_{O_2 \rightarrow O_3} P_{O_2}\end{aligned}\tag{S1}$$

where  $P_{O_1}$ ,  $P_{O_2}$  and  $P_{O_3}$  are the probabilities to occupy the  $O_1$ ,  $O_2$  and  $O_3$  sub-states, respectively. These probabilities are defined by the following expressions (4-6):

$$\begin{aligned}P_{O_1} &= \frac{T_{O_1}}{T} = \frac{N_{O_1} \tau_{O_1}}{T} = f_{O_1} \tau_{O_1} \\ P_{O_2} &= \frac{T_{O_2}}{T} = \frac{N_{O_2} \tau_{O_2}}{T} = (f_{O_1} + f_{O_3}) \tau_{O_2} \\ P_{O_3} &= \frac{T_{O_3}}{T} = \frac{N_{O_3} \tau_{O_3}}{T} = f_{O_3} \tau_{O_3}\end{aligned}\tag{S2}$$

Here,  $T_{O_1}$ ,  $T_{O_2}$  and  $T_{O_3}$  are the total times occupied by the  $O_1$ ,  $O_2$  and  $O_3$  sub-states, respectively.  $N_{O_1}$ ,  $N_{O_2}$  and  $N_{O_3}$  are the total recorded events that correspond to the  $O_1$ ,  $O_2$  and  $O_3$  sub-states, respectively.  $T$  indicates the total recording time.  $f$  and  $\tau$  denote the event frequency and the average dwell time for a well-defined sub-state, respectively. The equations (S2) show two components for the  $O_2$  state, corresponding to transitions toward the  $O_1$  and  $O_3$  sub-states. In other words, the well made by the  $O_2$  sub-state is flanked by two barriers for reaching the  $O_1$  and  $O_3$  sub-states.

The rates for reaching the  $O_1$  and  $O_3$  sub-states are just the corresponding event frequencies, which are normalized to the  $P_{O_2}$  probability:

$$\begin{aligned}k_{O_2 \rightarrow O_1} &= \frac{f_{O_1}}{P_{O_2}} = \frac{f_{O_1}}{1 - f_{O_1} \tau_{O_1} - f_{O_3} \tau_{O_3}} \\ k_{O_2 \rightarrow O_3} &= \frac{f_{O_3}}{P_{O_2}} = \frac{f_{O_3}}{1 - f_{O_1} \tau_{O_1} - f_{O_3} \tau_{O_3}}\end{aligned}\tag{S3}$$

At equilibrium, the partial derivatives of equations (S1) are zero, since the event probabilities are constant. Therefore,

$$\begin{aligned}k_{O_1 \rightarrow O_2} &= \frac{1}{\tau_{O_1}} \\ k_{O_3 \rightarrow O_2} &= \frac{1}{\tau_{O_3}}\end{aligned}\tag{S4}$$

The equations (S3) and (S4) indicate that the four rates, which describe the kinetic scheme with three open sub-states, can be calculated using the event frequencies and the average dwell times of the flanked  $O_1$  and  $O_3$  sub-states. In addition, the equations (S3) and (S4) confirm the general rule that the average dwell time in a particular sub-state is given by the reciprocal of the sum of the kinetic rate constants for the transitions occurring away from that respective sub-state (3;7-9):

$$\frac{1}{\tau_{O_2}} = k_{O_2 \rightarrow O_1} + k_{O_2 \rightarrow O_3}\tag{S5}$$

**Table S1: The standard free energies corresponding to various gating transitions of the Occk1 protein.** (A) 1 M KCl; (B) 2 M KCl; (C) 3 M KCl; (D) 4 M KCl. The buffer solution contained 10 mM potassium phosphate, pH 8.0. All standard free energy ( $\Delta G$ ) values are given in  $k_B T$ . Data represent averages  $\pm$  SDs over a number of at least three distinct single-channel electrical recordings.

A.

| $U$ (mV) | $\Delta G_{O1 \rightarrow O2}$ | $\Delta G_{O3 \rightarrow O2}$ |
|----------|--------------------------------|--------------------------------|
| -80      | $-2.8 \pm 0.2$                 | $-1.6 \pm 0.1$                 |
| -60      | $-3.4 \pm 0.2$                 | $-1.6 \pm 0.1$                 |
| -40      | $-4.4 \pm 0.5$                 | $-1.5 \pm 0.1$                 |
| -20      | $-4.9 \pm 0.6$                 | $-1.8 \pm 0.1$                 |
| +20      | $-3.7 \pm 0.1$                 | $-2.0 \pm 0.1$                 |
| +40      | $-3.4 \pm 0.2$                 | $-1.6 \pm 0.3$                 |
| +60      | $-3.3 \pm 0.5$                 | $-1.8 \pm 0.2$                 |
| +80      | $-2.6 \pm 0.1$                 | $-1.6 \pm 0.2$                 |

B.

| $U$ (mV) | $\Delta G_{O1 \rightarrow O2}$ | $\Delta G_{O3 \rightarrow O2}$ |
|----------|--------------------------------|--------------------------------|
| -80      | $-3.0 \pm 0.2$                 | $-1.2 \pm 0.3$                 |
| -60      | $-3.3 \pm 0.4$                 | $-1.1 \pm 0.3$                 |
| -40      | $-3.6 \pm 0.3$                 | $-0.8 \pm 0.5$                 |
| -20      | $-3.7 \pm 0.1$                 | $-1.1 \pm 0.4$                 |
| +20      | $-3.5 \pm 0.4$                 | $-1.1 \pm 0.3$                 |
| +40      | $-3.5 \pm 0.4$                 | $-0.9 \pm 0.3$                 |
| +60      | $-3.3 \pm 0.5$                 | $-1.4 \pm 0.2$                 |
| +80      | $-3.3 \pm 0.5$                 | $-1.4 \pm 0.2$                 |

C.

| $U$ (mV) | $\Delta G_{O1 \rightarrow O2}$ | $\Delta G_{O3 \rightarrow O2}$ |
|----------|--------------------------------|--------------------------------|
| -80      | $-2.7 \pm 0.3$                 | $-0.9 \pm 0.5$                 |
| -60      | $-3.3 \pm 0.1$                 | $-0.9 \pm 0.3$                 |
| -40      | $-3.9 \pm 0.2$                 | $-1.5 \pm 0.1$                 |
| -20      | $-4.0 \pm 0.3$                 | $-1.3 \pm 0.1$                 |
| +20      | $-4.2 \pm 0.3$                 | $-1.6 \pm 0.3$                 |
| +40      | $-4.0 \pm 0.6$                 | $-1.4 \pm 0.1$                 |
| +60      | $-4.0 \pm 0.9$                 | $-1.3 \pm 0.1$                 |
| +80      | $-3.6 \pm 1.1$                 | $-1.1 \pm 0.2$                 |

D.

| $U$ (mV) | $\Delta G_{O1 \rightarrow O2}$ | $\Delta G_{O3 \rightarrow O2}$ |
|----------|--------------------------------|--------------------------------|
| -80      | $-3.2 \pm 0.1$                 | $-0.4 \pm 0.4$                 |
| -60      | $-3.0 \pm 0.1$                 | $-0.1 \pm 0.4$                 |
| -40      | $-3.6 \pm 0.4$                 | $-0.2 \pm 0.3$                 |
| -20      | $-3.9 \pm 0.2$                 | $-0.3 \pm 0.2$                 |
| +20      | $-4.8 \pm 0.3$                 | $-0.4 \pm 0.2$                 |
| +40      | $-4.2 \pm 0.6$                 | $-0.4 \pm 0.3$                 |
| +60      | $-4.1 \pm 0.6$                 | $-0.4 \pm 0.2$                 |
| +80      | $-4.2 \pm 0.6$                 | $-0.3 \pm 0.2$                 |



## References

1. McManus, O. B., Blatz, A. L., and Magleby, K. L. (1987) Sampling, Log Binning, Fitting, and Plotting Durations of Open and Shut Intervals From Single Channels and the Effects of Noise, *Pflugers Arch.* 410, 530-553.
2. McManus, O. B. and Magleby, K. L. (1988) Kinetic states and modes of single large-conductance calcium-activated potassium channels in cultured rat skeletal-muscle, *J. Physiol. (Lond. )* 402, 79-120.
3. Aidley, D. J. and Stanfield, P. R. (1996) *Ion channels - Molecules in action* Cambridge University Press, Cambridge.
4. Urry, D. W., Venkatachalam, C. M., Spisni, A., Lauger, P., and Khaled, M. A. (1980) Rate theory calculation of gramicidin single-channel currents using NMR-derived rate constants, *Proc. Natl. Acad. Sci. U. S. A* 77, 2028-2032.
5. Kostyuk, P. G., Shuba, Y., and Teslenko, V. I. (1989) Activation kinetics of single high-threshold calcium channels in the membrane of sensory neurons from mouse embryos, *J. Membr. Biol.* 110, 29-38.
6. Moss, G. W. J. and Moczydlowski, E. (2002) Concepts of single-channel analysis: inferring function from fluctuations, in *Ion Channels - A Practical Approach* (Ashley, R. H., Ed.) Second ed., pp 69-112, Oxford University Press, Oxford.
7. Goodrich, C. P., Kirmizialtin, S., Huyghues-Despointes, B. M., Zhu, A. P., Scholtz, J.M., Makarov, D. E., and Movileanu, L. (2007) Single-molecule electrophoresis of beta-hairpin peptides by electrical recordings and Langevin dynamics simulations, *J. Phys. Chem. B* 111, 3332-3335.
8. Mohammad, M. M. and Movileanu, L. (2008) Excursion of a single polypeptide into a protein pore: simple physics, but complicated biology, *Eur. Biophys. J.* 37, 913-925.
9. Bikwemu, R., Wolfe, A. J., Xing, X., and Movileanu, L. (2010) Facilitated translocation of polypeptides through a single nanopore, *J. Phys. :Condens. Matter* 22, 454117.
